# Supplementary material for: p73 regulates basal and starvation-induced liver metabolism in vivo
Source: PubMed Central journal article supplement (PMC4741757; doi:10.18632/oncotarget.5090), 2015-09-07
Supplement: oncotarget-06-33178-s001.pdf [file oncotarget-06-33178-s001.pdf]

SUPPLEMENTARY FIGURE AND TABLE

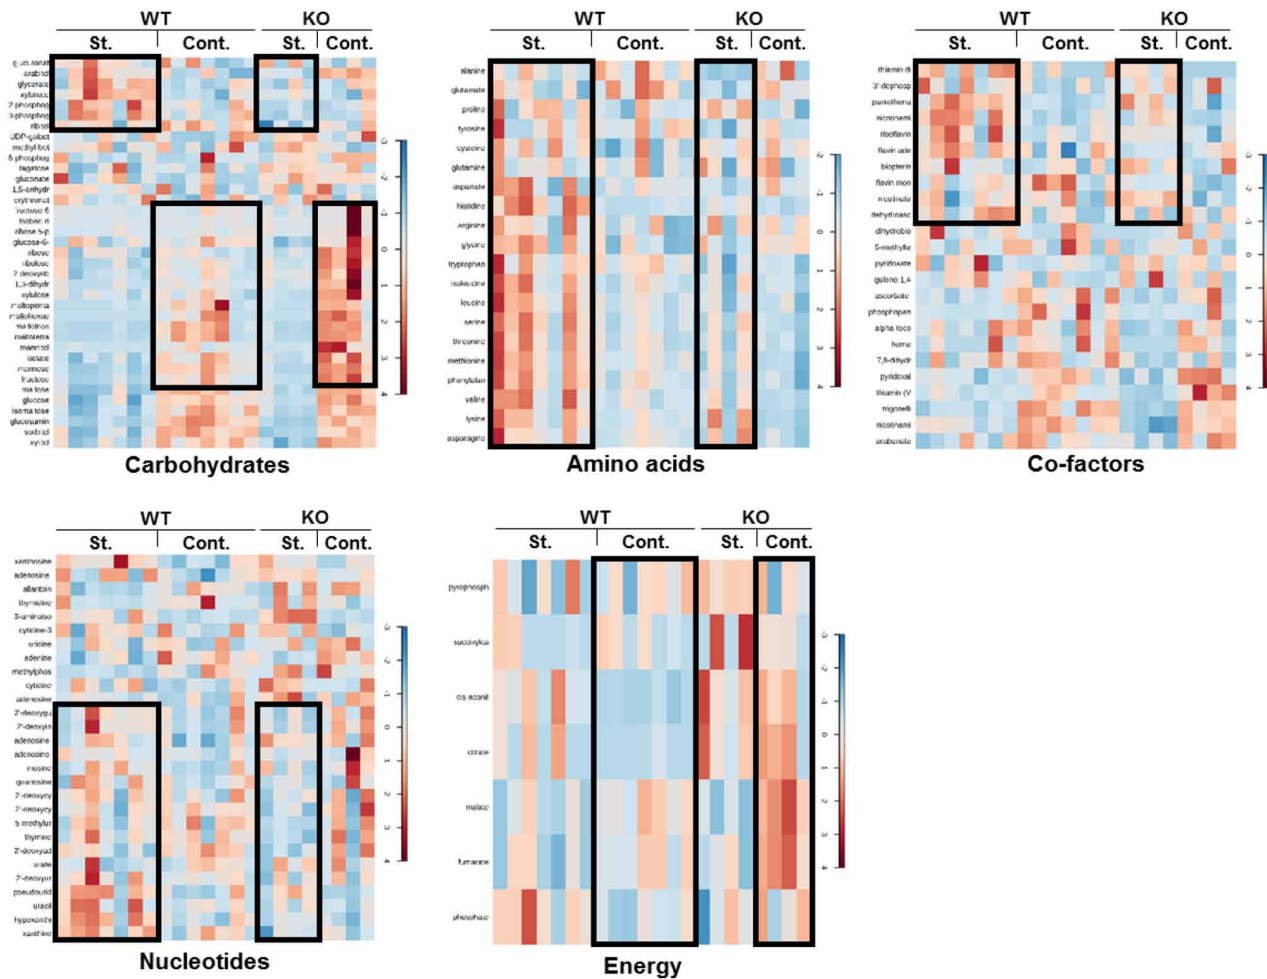

**Supplementary Figure S1: Selected heat maps showing specific groups of metabolites.** The black boxes indicate the extensive changes of the metabolites in different conditions. St.: starvation, Cont.: control.

**Supplementary Table S1: Summary of 347 found metabolites.** The *p* values of each compound including  $P_{\text{contrasts}}$ ,  $P_{\text{genotype}}$ ,  $P_{\text{treatment}}$  and  $P_{\text{interaction}}$  were calculated via 2-way ANOVA and ANOVA contrasts.
